# Supplementary material
Source: PubMed Central journal article supplement (PMC5564334)
Supplement: Figure_S1.pdf [file Figure_S1.pdf]

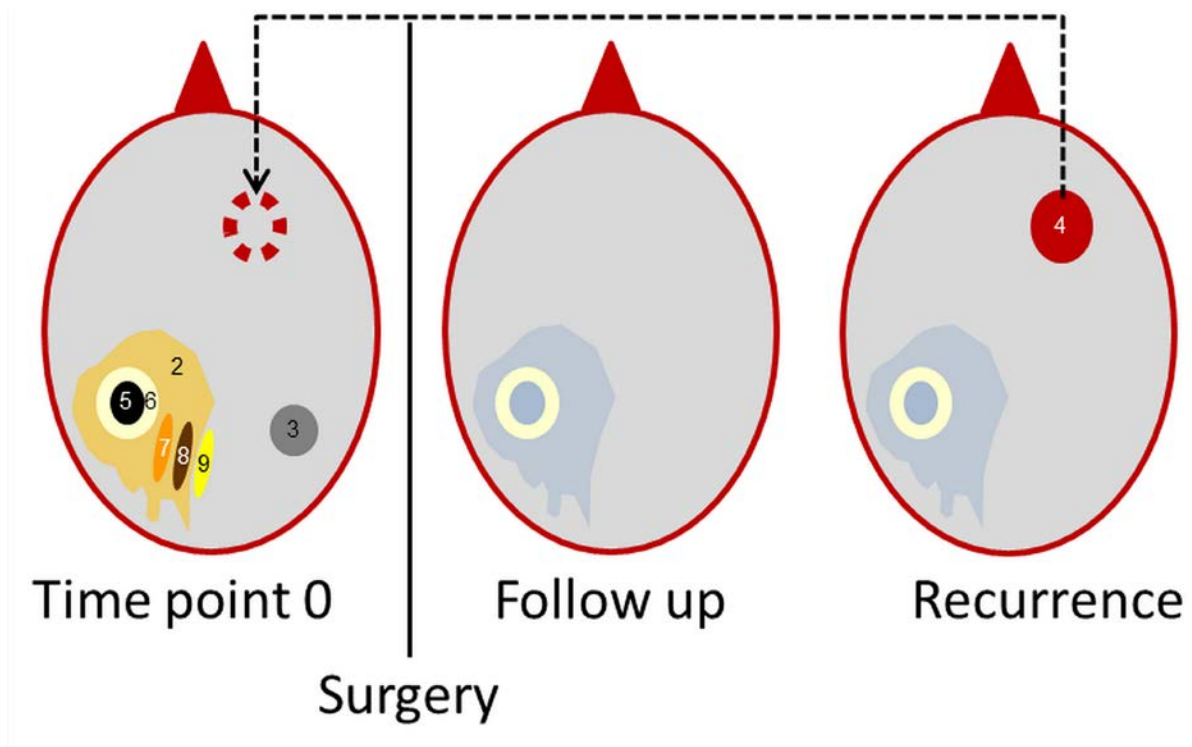

**Figure S1.** Scheme drawing of evaluated regions of interest.

ROIs have been labelled according to the numbers used for statistical analysis as visible in the supplementary table S1. 2: total T2/FLAIR hyperintensity; 3: contralateral normal appearing matter (NAM\_contra); 4: FLAIR Hyperintensity of recurrent tumor (recurrence); red dotted oval: recurrent tumor as overlay on time point 0; 5: necrosis; 6: contrast enhancing tumor (ce\_tumour); 7: flair hyperintensity adjacent to flair\_edge (flair\_hyper); 8: flair hyperintensity adjacent to the edge of the flair hyperintense region (flair\_edge); 9: normal appearing matter adjacent to but outside of the flair hyperintense region (NAM\_outside).
