# Supplementary material
Source: PubMed Central journal article supplement (PMC5564334)
Supplement: Figure_S2.pdf [file Figure_S2.pdf]

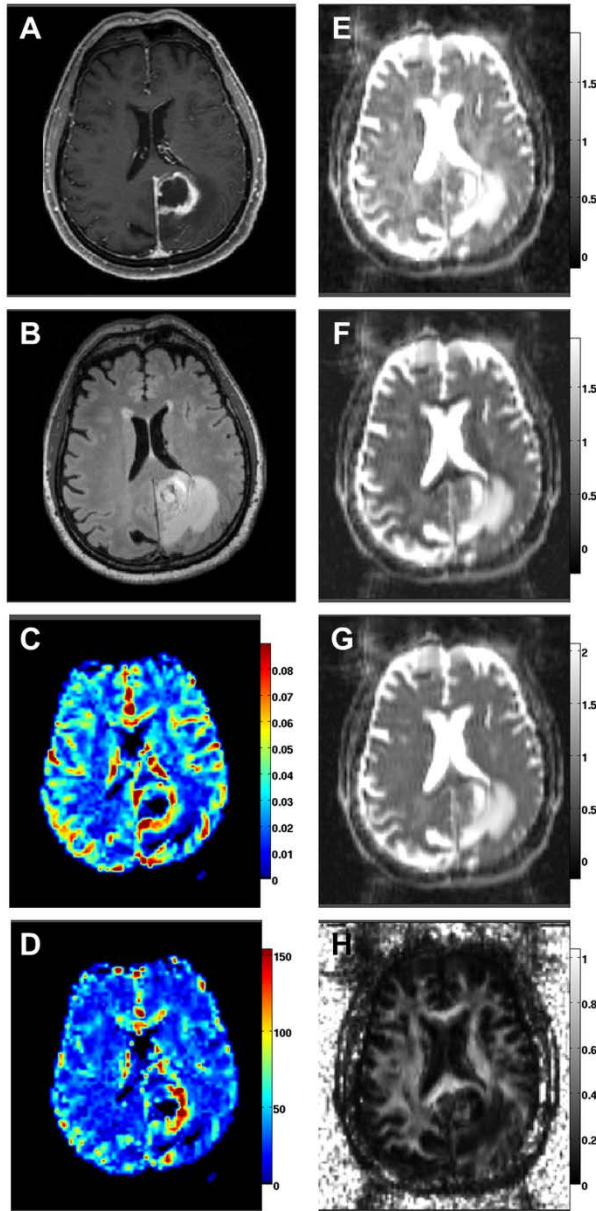

**Figure S2** CBV, VSI and DTI parametric maps shown exemplarily for one patient.

Contrast enhanced T1 image (A) with matching FLAIR image (B) and CBV- (C), VSI- (D), AD- (E), RD- (F), MD (G) and FA- (H) maps of one patient.
