# Supplementary material
Source: PubMed Central journal article supplement (PMC5564334)
Supplement: Table_S1_All_data_revised.pdf [file Table_S1_All_data_revised.pdf]

| Variable Name       | Name legend                                                                          | Value legend                                                                                                                                                                                                                                                                                                                                                                                                                                                                                                                                                                                |
|---------------------|--------------------------------------------------------------------------------------|---------------------------------------------------------------------------------------------------------------------------------------------------------------------------------------------------------------------------------------------------------------------------------------------------------------------------------------------------------------------------------------------------------------------------------------------------------------------------------------------------------------------------------------------------------------------------------------------|
| Patient             | Patient number                                                                       | Numeric values                                                                                                                                                                                                                                                                                                                                                                                                                                                                                                                                                                              |
|                     |                                                                                      | 1 = FLAIR hyperintensity incl. contrast enhancing edge without necrosis<br>2 = FLAIR hyperintensity without contrast enhancing edge<br>3 = Contralateral normal appearing matter (NAM_contra)<br>4 = FLAIR Hyperintensity of recurrent tumor (recurrence)<br>5 = Necrosis<br>6 = Contrast enhancing tumor (ce_tumour)<br>7 = FLAIR hyperintensity adjacent to flair_edge (flair_hyper)<br>8 = FLAIR hyperintensity adjacent to the edge of the flair hyperintense region (flair_edge)<br>9 = normal appearing matter adjacent to but outside of the flair hyperintense region (NAM_outside) |
| Tissue              | Tissue (ROI)                                                                         |                                                                                                                                                                                                                                                                                                                                                                                                                                                                                                                                                                                             |
| Sex                 | Patient sex                                                                          | 1 = male<br>2 = female                                                                                                                                                                                                                                                                                                                                                                                                                                                                                                                                                                      |
| Age                 | Age [years]                                                                          | Numeric values                                                                                                                                                                                                                                                                                                                                                                                                                                                                                                                                                                              |
| Time_to_Progression | Time to progression [d]                                                              | Numeric values<br>0 = no data/no information                                                                                                                                                                                                                                                                                                                                                                                                                                                                                                                                                |
| Time_of_Observation | Time of observation [d]                                                              | Numeric values<br>0 = no data/no information                                                                                                                                                                                                                                                                                                                                                                                                                                                                                                                                                |
| IDH_one_Mutation    | IDH-1 mutation                                                                       | 1 = negative<br>2 = positive<br>3 = no information/no data                                                                                                                                                                                                                                                                                                                                                                                                                                                                                                                                  |
| MIB_1               | MIB-1 proliferation index [%]                                                        | Numeric values<br>0 = no data/no information                                                                                                                                                                                                                                                                                                                                                                                                                                                                                                                                                |
| Histo               | Histological tumor classification                                                    | 1 = Glioblastoma multiforme<br>2 = Gliosarcoma                                                                                                                                                                                                                                                                                                                                                                                                                                                                                                                                              |
| Side                | Side of the tumor                                                                    | 1 = left<br>2 = right<br>3 = bilateral                                                                                                                                                                                                                                                                                                                                                                                                                                                                                                                                                      |
| Localization        | Anatomical localisation                                                              | 1 = left temporal<br>2 = right temporal<br>3 = left insula, temporal pole<br>4 = right insula, thalamus, temporal lobe<br>5 = frontal<br>6 = parietal<br>7 = occipital                                                                                                                                                                                                                                                                                                                                                                                                                      |
| CE                  | Contrast enhancement                                                                 | 1 = < 5%<br>2 = > 5%                                                                                                                                                                                                                                                                                                                                                                                                                                                                                                                                                                        |
| T2_infil_ed         | Pattern of T2 hyperintensity                                                         | 1 = Edematous<br>2 = Infiltrative                                                                                                                                                                                                                                                                                                                                                                                                                                                                                                                                                           |
| Necrosis            | Amount of necrosis                                                                   | 1 = Minor<br>2 = Pronounced                                                                                                                                                                                                                                                                                                                                                                                                                                                                                                                                                                 |
| Cort_involv         | Involvement of cortex by contrast enhancing tumor                                    | 1 = Cortex not involved<br>2 = Cortex involved                                                                                                                                                                                                                                                                                                                                                                                                                                                                                                                                              |
| Subv_zone           | Involvement of subventricular zone by contrast enhancing tumor                       | 1 = Subventricular zone not involved<br>2 = Subventricular zone involved                                                                                                                                                                                                                                                                                                                                                                                                                                                                                                                    |
| ME                  | Degree of mass effect                                                                | 1 = None to mild<br>2 = Moderate to severe                                                                                                                                                                                                                                                                                                                                                                                                                                                                                                                                                  |
| Edema               | Degree of edema                                                                      | 1 = None to Mild<br>2 = Moderate to severe                                                                                                                                                                                                                                                                                                                                                                                                                                                                                                                                                  |
| T2_heterogen        | T2 heterogeneity                                                                     | 1 = None to Mild (< 5%)<br>2 = Moderate to severe (> 5%)                                                                                                                                                                                                                                                                                                                                                                                                                                                                                                                                    |
| CE_Nec_ratio        | Contrast enhancement/necrosis ratio                                                  | 1 = ratio < 1<br>2 = ratio ≥ 1                                                                                                                                                                                                                                                                                                                                                                                                                                                                                                                                                              |
| CE_T2_FLAIR_ratio   | Contrast enhancing volume/T2-hyperintensity volume ratio                             | 1 = ratio < 1<br>2 = ratio ≥ 1                                                                                                                                                                                                                                                                                                                                                                                                                                                                                                                                                              |
| Recurrence          | Recurrence                                                                           | 1 = recurrence<br>2 = no recurrence<br>3 = no data                                                                                                                                                                                                                                                                                                                                                                                                                                                                                                                                          |
| RD                  | Radial Diffusivity [x10-3mm2/s]                                                      | Numeric values<br>.00 = no data/no information                                                                                                                                                                                                                                                                                                                                                                                                                                                                                                                                              |
| AD                  | Axial Diffusivity [x10-3mm2/s]                                                       | Numeric values<br>.00 = no data/no information                                                                                                                                                                                                                                                                                                                                                                                                                                                                                                                                              |
| MD                  | Mean Diffusivity [x10-3mm2/s]                                                        | Numeric values<br>.00 = no data/no information                                                                                                                                                                                                                                                                                                                                                                                                                                                                                                                                              |
| FA                  | Fractional Anisotropy                                                                | Numeric values<br>.00 = no data/no information                                                                                                                                                                                                                                                                                                                                                                                                                                                                                                                                              |
| VSI                 | Vessel Size [µm]                                                                     | Numeric values<br>0 = no data/no information                                                                                                                                                                                                                                                                                                                                                                                                                                                                                                                                                |
| CBV                 | Cerebral Blood Volume [%]                                                            | Numeric values<br>0 = no data/no information                                                                                                                                                                                                                                                                                                                                                                                                                                                                                                                                                |
| Creatin_ipsi_contra | Creatine normalized to creatine of the contralateral normal appearing matter         | Numeric values<br>.00 = no data/no information                                                                                                                                                                                                                                                                                                                                                                                                                                                                                                                                              |
| mlno_ipsi_contra    | myo-inositol normalized to myo-inositol of the contralateral normal appearing matter | Numeric values<br>.00 = no data/no information                                                                                                                                                                                                                                                                                                                                                                                                                                                                                                                                              |
| Cholin_ipsi_contra  | Choline normalized to choline of the contralateral normal appearing matter           | Numeric values<br>.00 = no data/no information                                                                                                                                                                                                                                                                                                                                                                                                                                                                                                                                              |
| NAA_ipsi_contra     | NAA normalized to NAA of the contralateral normal appearing matter                   | Numeric values<br>.00 = no data/no information                                                                                                                                                                                                                                                                                                                                                                                                                                                                                                                                              |
| Glx_ipsi_contra     | Glx normalized to Glx of the contralateral normal appearing matter                   | Numeric values<br>.00 = no data/no information                                                                                                                                                                                                                                                                                                                                                                                                                                                                                                                                              |
| FWHM                | Full width at half maximum                                                           | Numeric values<br>.000 = no data/no information                                                                                                                                                                                                                                                                                                                                                                                                                                                                                                                                             |
