# Supplementary material
Source: PubMed Central journal article supplement (PMC5564334)
Supplement: Table_S2_Metabolites_between_IDH_groups_new.pdf [file Table_S2_Metabolites_between_IDH_groups_new.pdf]

| <b>Metabolites from all 3 ROIs together</b> |                               |        |       |                               |        |       |                     |                  |
|---------------------------------------------|-------------------------------|--------|-------|-------------------------------|--------|-------|---------------------|------------------|
|                                             | IDH-wildtype<br>(15 patients) |        |       | IDH1-mutation<br>(2 patients) |        |       | p <sub>uncorr</sub> | Statistical test |
|                                             | n                             | Median | SD    | n                             | Median | SD    |                     |                  |
| nCr                                         | 43                            | 0.850  | 0.435 | 5                             | 0.300  | 0.367 | <b>0.049</b>        | T-test           |
| nml                                         | 42                            | 0.675  | 1.749 | 5                             | 0.480  | 0.215 | 0.080               | Mann-Whitney-U   |
| nCho                                        | 43                            | 1.310  | 0.805 | 5                             | 0.730  | 0.402 | 0.054               | T-test           |
| nNAA                                        | 42                            | 0.610  | 0.307 | 5                             | 0.560  | 0.255 | 0.358               | T-test           |
| nGlx                                        | 43                            | 1.030  | 0.436 | 5                             | 1.230  | 0.756 | <b>0.045</b>        | T-test           |

  

| <b>Metabolites from ce_tumour</b> |                               |        |       |                               |        |       |                     |                  |
|-----------------------------------|-------------------------------|--------|-------|-------------------------------|--------|-------|---------------------|------------------|
|                                   | IDH-wildtype<br>(15 patients) |        |       | IDH1-mutation<br>(2 patients) |        |       | p <sub>uncorr</sub> | Statistical test |
|                                   | n                             | Median | SD    | n                             | Median | SD    |                     |                  |
| nCr                               | 15                            | 0.570  | 0.487 | 2                             | 0.210  | 0.127 | 0.136               | T-test           |
| nml                               | 14                            | 0.580  | 0.795 | 2                             | 0.305  | 0.262 | 0.200               | Mann-Whitney-U   |
| nCho                              | 15                            | 1.910  | 0.929 | 2                             | 0.625  | 0.361 | 0.088               | T-test           |
| nNAA                              | 14                            | 0.420  | 0.178 | 2                             | 0.250  | 0.000 | 0.227               | T-test           |
| nGlx                              | 15                            | 1.030  | 0.443 | 2                             | 2.010  | 1.103 | 0.463               | T-test           |

  

| <b>Metabolites from flair_hyper</b> |                               |        |       |                               |        |     |                     |                  |
|-------------------------------------|-------------------------------|--------|-------|-------------------------------|--------|-----|---------------------|------------------|
|                                     | IDH-wildtype<br>(15 patients) |        |       | IDH1-mutation<br>(2 patients) |        |     | p <sub>uncorr</sub> | Statistical test |
|                                     | n                             | Median | SD    | n                             | Median | SD  |                     |                  |
| nCr                                 | 13                            | 0.860  | 0.261 | 1                             | 0.700  | n.a | n.a.                | T-test           |
| nml                                 | 13                            | 0.610  | 2.719 | 1                             | 0.480  | n.a | n.a.                | Mann-Whitney-U   |
| nCho                                | 13                            | 1.160  | 0.463 | 1                             | 0.720  | n.a | n.a.                | T-test           |
| nNAA                                | 13                            | 0.540  | 0.194 | 1                             | 0.690  | n.a | n.a.                | T-test           |
| nGlx                                | 13                            | 0.980  | 0.350 | 1                             | 0.840  | n.a | n.a.                | T-test           |

  

| <b>Metabolites from NAM_outside</b> |                               |        |       |                               |        |       |                     |                  |
|-------------------------------------|-------------------------------|--------|-------|-------------------------------|--------|-------|---------------------|------------------|
|                                     | IDH-wildtype<br>(15 patients) |        |       | IDH1-mutation<br>(2 patients) |        |       | p <sub>uncorr</sub> | Statistical test |
|                                     | n                             | Median | SD    | n                             | Median | SD    |                     |                  |
| nCr                                 | 15                            | 1.040  | 0.470 | 2                             | 0.655  | 0.516 | 0.263               | T-test           |
| nml                                 | 15                            | 0.830  | 1.377 | 2                             | 0.535  | 0.247 | 0.176               | Mann-Whitney-U   |
| nCho                                | 15                            | 1.190  | 0.807 | 2                             | 1.100  | 0.523 | 0.644               | T-test           |
| nNAA                                | 15                            | 0.850  | 0.289 | 2                             | 0.685  | 0.177 | 0.311               | T-test           |
| nGlx                                | 15                            | 1.030  | 0.513 | 2                             | 1.445  | 0.346 | 0.360               | T-test           |

**Supplementary Table S2:** Metabolites values depending on the IDH-status. **Abbreviations:** n:

number of spectra with Cramer-Rao bounds of less than 20%; p<sub>uncorr</sub>: uncorrected p-value; SD:

standard deviation; n.a.: not applicable; nCho: normalized choline; nCr: normalized creatine; nGlx:

normalized glutamate and glutamine; nml: normalized *myo*-inositol; nNAA: normalized N-

acetylaspartate and N-acetylaspartylglutamate.
